# Supplementary material for: Decoding Complex Chemical Mixtures with a Physical Model of a Sensor Array
Source: PLoS Comput Biol. 2011 Oct 20;7(10):e1002224. doi: 10.1371/journal.pcbi.1002224 (PMC3202980; doi:10.1371/journal.pcbi.1002224)
Supplement: Dataset S1 — Normalized fluorescence intensity measurements from experiments with equal-proportion ( Fig. 2 ) and unequal-proportion ( Fig. 3 ) mixtures. (XLS) [file pcbi.1002224.s013.xls]

## Sheet: Sheet1
		Normalized Fluorescence Readouts from Experiments Using EQUAL Mixtures:
H-20 plate 1																														H-20 plate 2
	UDP-GlcNAC				UDP				UDP-GlcNAC + UDP				UDP-Gal				UDP-Gal + UDP-GlcNAC				UDP + UDP-Gal				UDP-GlcNAC + UDP + UDP-Gal						UDP-Glc				UDP-Glc + UDP-GlcNAC				UDP-Glc + UDP				UDP-Glc + UDP-GlcNAC + UDP				UDP-Glc + UDP-Gal
Log10 [conc]	Sample 1	Sample 2	Sample 3	Sample 4	Sample 1	Sample 2	Sample 3	Sample 4	Sample 1	Sample 2	Sample 3	Sample 4	Sample 1	Sample 2	Sample 3	Sample 4	Sample 1	Sample 2	Sample 3	Sample 4	Sample 1	Sample 2	Sample 3	Sample 4	Sample 1	Sample 2	Sample 3	Sample 4		Log10 [conc]	Sample 1	Sample 2	Sample 3	Sample 4	Sample 1	Sample 2	Sample 3	Sample 4	Sample 1	Sample 2	Sample 3	Sample 4	Sample 1	Sample 2	Sample 3	Sample 4	Sample 1	Sample 2	Sample 3
-3	0.46	0.47	0.5	0.47	0.03	0.02	0.03	0.02	0.06	0.06	0.06	0.05	1	0.99	0.99	1	0.92	0.86	1	0.85	0.28	0.29	0.31	0.27	0.33	0.35	0.33	0.27		-3	0.77	0.7	0.64	0.76	0.64	0.56	0.68	0.64	0.2	0.19	0.2	0.2	0.23	0.24	0.25	0.25	0.99	0.99	0.96
-3.5	0.46	0.48	0.55	0.48	0.03	0.03	0.03	0.02	0.05	0.05	0.06	0.05	0.98	0.99	0.99	0.96	0.93	0.85	0.9	0.92	0.25	0.27	0.25	0.27	0.29	0.29	0.34	0.31		-3.5	0.72	0.79	0.8	0.74	0.62	0.58	0.71	0.67	0.15	0.16	0.15	0.15	0.18	0.19	0.21	0.18	0.92	0.82	0.88
-4	0.37	0.44	0.48	0.42	0.02	0.03	0.03	0.03	0.06	0.05	0.06	0.05	0.99	0.99	0.94	0.96	0.68	0.74	0.82	0.84	0.21	0.21	0.24	0.21	0.24	0.26	0.27	0.27		-4	0.53	0.58	0.61	0.63	0.54	0.55	0.55	0.58	0.12	0.11	0.14	0.11	0.14	0.17	0.17	0.16	0.85	0.8	0.87
-4.5	0.23	0.28	0.3	0.3	0.02	0.02	0.03	0.02	0.04	0.04	0.05	0.04	0.77	0.75	0.81	0.74	0.54	0.57	0.69	0.61	0.17	0.17	0.18	0.16	0.16	0.18	0.21	0.19		-4.5	0.4	0.43	0.49	0.42	0.39	0.38	0.41	0.46	0.09	0.09	0.09	0.09	0.11	0.11	0.13	0.11	0.62	0.63	0.7
-5	0.1	0.1	0.13	0.12	0.02	0.02	0.02	0.02	0.03	0.03	0.03	0.03	0.44	0.39	0.5	0.46	0.29	0.28	0.34	0.29	0.09	0.09	0.11	0.1	0.09	0.1	0.11	0.11		-5	0.29	0.24	0.26	0.22	0.18	0.16	0.23	0.21	0.07	0.06	0.06	0.06	0.07	0.06	0.07	0.06	0.31	0.33	0.35
-5.5	0.04	0.04	0.04	0.04	0.02	0.02	0.02	0.02	0.02	0.02	0.02	0.02	0.14	0.17	0.17	0.2	0.08	0.09	0.1	0.11	0.04	0.06	0.05	0.05	0.05	0.05	0.05	0.05		-5.5	0.08	0.09	0.09	0.09	0.05	0.06	0.07	0.07	0.03	0.03	0.03	0.03	0.03	0.04	0.03	0.04	0.1	0.11	0.11
-6	0.02	0.02	0.02	0.02	0.02	0.02	0.02	0.02	0.02	0.02	0.02	0.02	0.04	0.05	0.06	0.06	0.03	0.03	0.04	0.03	0.03	0.03	0.03	0.03	0.03	0.02	0.03	0.03		-6	0.03	0.03	0.03	0.03	0.02	0.03	0.03	0.03	0.02	0.02	0.02	0.02	0.02	0.02	0.02	0.02	0.04	0.04	0.04
-6.5	0.02	0.02	0.02	0.02	0.02	0.02	0.02	0.02	0.02	0.02	0.02	0.02	0.02	0.02	0.02	0.02	0.02	0.02	0.02	0.02	0.02	0.02	0.02	0.02	0.02	0.02	0.02	0.02		-6.5	0.02	0.01	0.02	0.02	0.02	0.02	0.02	0.02	0.02	0.02	0.02	0.01	0.02	0.02	0.02	0.02	0.02	0.02	0.02
-9	0.02	0.02	0.02	0.02	0.01	0.02	0.02	0.02	0.02	0.02	0.02	0.02	0.02	0.02	0.02	0.02	0.02	0.02	0.02	0.02	0.02	0.02	0.02	0.02	0.02	0.02	0.02	0.01		-9	0.02	0.02	0.02	0.02	0.02	0.02	0.02	0.02	0.02	0.02	0.02	0.02	0.02	0.02	0.02	0.02	0.01	0.02	0.02
K-3 plate 1																														K-3 plate 2
	UDP-GlcNAC				UDP				UDP-GlcNAC + UDP				UDP-Gal				UDP-Gal + UDP-GlcNAC				UDP + UDP-Gal				UDP-GlcNAC + UDP + UDP-Gal						UDP-Glc				UDP-Glc + UDP-GlcNAC				UDP-Glc + UDP				UDP-Glc + UDP-GlcNAC + UDP				UDP-Glc + UDP-Gal
Log10 [conc]	Sample 1	Sample 2	Sample 3	Sample 4	Sample 1	Sample 2	Sample 3	Sample 4	Sample 1	Sample 2	Sample 3	Sample 4	Sample 1	Sample 2	Sample 3	Sample 4	Sample 1	Sample 2	Sample 3	Sample 4	Sample 1	Sample 2	Sample 3	Sample 4	Sample 1	Sample 2	Sample 3	Sample 4		Log10 [conc]	Sample 1	Sample 2	Sample 3	Sample 4	Sample 1	Sample 2	Sample 3	Sample 4	Sample 1	Sample 2	Sample 3	Sample 4	Sample 1	Sample 2	Sample 3	Sample 4	Sample 1	Sample 2	Sample 3
-3	0.6	0.56	0.64	0.56	0.36	0.3	0.41	0.35	0.51	0.41	0.39	0.34	1	0.75	0.88	0.78	0.75	0.72	0.91	0.76	0.33	0.33	0.39	0.33	0.35	0.4	0.45	0.37		-3	1	0.87	0.89	0.83	0.61	0.55	0.63	0.55	0.26	0.24	0.28	0.2	0.24	0.22	0.28	0.22	0.61	0.59	0.65
-3.5	0.55	0.49	0.58	0.55	0.37	0.4	0.45	0.38	0.45	0.37	0.38	0.39	0.78	0.76	0.83	0.75	0.67	0.64	0.72	0.67	0.41	0.38	0.46	0.43	0.42	0.47	0.48	0.44		-3.5	0.77	0.82	0.81	0.71	0.54	0.57	0.59	0.54	0.27	0.27	0.31	0.3	0.28	0.24	0.26	0.24	0.56	0.56	0.64
-4	0.33	0.37	0.36	0.37	0.37	0.38	0.41	0.41	0.39	0.38	0.41	0.41	0.52	0.62	0.62	0.62	0.42	0.48	0.58	0.56	0.38	0.4	0.45	0.42	0.44	0.43	0.54	0.54		-4	0.52	0.52	0.5	0.49	0.33	0.38	0.38	0.33	0.25	0.25	0.29	0.29	0.25	0.28	0.28	0.28	0.41	0.48	0.46
-4.5	0.23	0.22	0.22	0.22	0.37	0.37	0.41	0.38	0.36	0.39	0.44	0.36	0.31	0.34	0.38	0.39	0.34	0.31	0.35	0.32	0.39	0.3	0.39	0.35	0.37	0.38	0.47	0.52		-4.5	0.27	0.25	0.26	0.24	0.16	0.17	0.2	0.19	0.26	0.29	0.29	0.26	0.29	0.24	0.28	0.26	0.25	0.25	0.26
-5	0.16	0.14	0.15	0.14	0.31	0.34	0.34	0.35	0.31	0.36	0.36	0.31	0.16	0.2	0.21	0.19	0.17	0.17	0.22	0.18	0.37	0.3	0.38	0.33	0.32	0.34	0.4	0.36		-5	0.13	0.13	0.13	0.12	0.1	0.11	0.13	0.12	0.23	0.22	0.24	0.21	0.18	0.2	0.23	0.23	0.11	0.12	0.14
-5.5	0.11	0.13	0.11	0.13	0.3	0.31	0.33	0.36	0.22	0.27	0.3	0.3	0.12	0.14	0.17	0.17	0.11	0.12	0.13	0.15	0.26	0.28	0.3	0.3	0.26	0.27	0.31	0.33		-5.5	0.09	0.1	0.09	0.1	0.09	0.09	0.09	0.1	0.17	0.19	0.19	0.2	0.16	0.17	0.19	0.19	0.09	0.09	0.1
-6	0.11	0.14	0.13	0.12	0.28	0.26	0.28	0.26	0.21	0.21	0.24	0.24	0.13	0.13	0.13	0.14	0.12	0.12	0.14	0.13	0.21	0.24	0.24	0.24	0.25	0.21	0.25	0.23		-6	0.08	0.09	0.09	0.09	0.08	0.08	0.09	0.09	0.14	0.16	0.18	0.16	0.12	0.13	0.15	0.14	0.08	0.09	0.09
-6.5	0.12	0.11	0.12	0.12	0.19	0.18	0.2	0.19	0.15	0.15	0.18	0.17	0.12	0.11	0.12	0.12	0.12	0.12	0.13	0.12	0.16	0.17	0.18	0.17	0.16	0.16	0.17	0.17		-6.5	0.07	0.07	0.08	0.07	0.07	0.08	0.08	0.08	0.11	0.11	0.11	0.11	0.11	0.08	0.1	0.1	0.08	0.08	0.09
-9	0.11	0.11	0.12	0.12	0.1	0.12	0.11	0.12	0.11	0.12	0.12	0.12	0.1	0.12	0.12	0.12	0.12	0.12	0.12	0.14	0.11	0.12	0.12	0.13	0.12	0.13	0.13	0.13		-9	0.07	0.08	0.08	0.08	0.07	0.08	0.08	0.08	0.07	0.08	0.08	0.08	0.07	0.08	0.08	0.08	0.07	0.08	0.08
L-3 plate 1																														L-3 plate 2
	UDP-GlcNAC				UDP				UDP-GlcNAC + UDP				UDP-Gal				UDP-Gal + UDP-GlcNAC				UDP + UDP-Gal				UDP-GlcNAC + UDP + UDP-Gal						UDP-Glc				UDP-Glc + UDP-GlcNAC				UDP-Glc + UDP				UDP-Glc + UDP-GlcNAC + UDP				UDP-Glc + UDP-Gal
Log10 [conc]	Sample 1	Sample 2	Sample 3	Sample 4	Sample 1	Sample 2	Sample 3	Sample 4	Sample 1	Sample 2	Sample 3	Sample 4	Sample 1	Sample 2	Sample 3	Sample 4	Sample 1	Sample 2	Sample 3	Sample 4	Sample 1	Sample 2	Sample 3	Sample 4	Sample 1	Sample 2	Sample 3	Sample 4		Log10 [conc]	Sample 1	Sample 2	Sample 3	Sample 4	Sample 1	Sample 2	Sample 3	Sample 4	Sample 1	Sample 2	Sample 3	Sample 4	Sample 1	Sample 2	Sample 3	Sample 4	Sample 1	Sample 2	Sample 3
-3	0.43	0.37	0.44	0.38	0.01	0.01	0.01	0.01	0.03	0.03	0.03	0.02	0.9	0.81	1	0.87	0.59	0.73	0.84	0.81	0.11	0.14	0.13	0.12	0.11	0.12	0.13	0.1		-3	0.89	0.97	1	0.99	0.71	0.71	0.8	0.78	0.32	0.29	0.35	0.35	0.31	0.29	0.33	0.25	0.94	0.93	0.96
-3.5	0.37	0.33	0.41	0.33	0.01	0.01	0.01	0.01	0.02	0.02	0.02	0.02	0.78	0.75	0.77	0.73	0.53	0.59	0.65	0.57	0.06	0.07	0.07	0.07	0.07	0.08	0.08	0.09		-3.5	0.69	0.89	0.77	0.82	0.73	0.7	0.72	0.7	0.2	0.25	0.21	0.2	0.2	0.22	0.23	0.23	0.73	0.86	0.85
-4	0.23	0.26	0.24	0.22	0.01	0.01	0.01	0.01	0.02	0.02	0.02	0.02	0.61	0.61	0.57	0.72	0.55	0.52	0.47	0.49	0.04	0.05	0.05	0.04	0.06	0.06	0.07	0.06		-4	0.73	0.71	0.74	0.7	0.61	0.67	0.68	0.78	0.15	0.15	0.17	0.16	0.13	0.15	0.14	0.12	0.74	0.83	0.7
-4.5	0.15	0.16	0.13	0.14	0.01	0.01	0.01	0.01	0.01	0.01	0.02	0.01	0.45	0.52	0.49	0.46	0.36	0.35	0.4	0.37	0.03	0.03	0.03	0.03	0.04	0.04	0.04	0.03		-4.5	0.55	0.57	0.56	0.51	0.48	0.4	0.55	0.5	0.09	0.09	0.11	0.1	0.09	0.11	0.11	0.1	0.51	0.54	0.63
-5	0.05	0.05	0.06	0.06	0.01	0.01	0.01	0.01	0.01	0.01	0.01	0.01	0.26	0.24	0.32	0.29	0.18	0.19	0.21	0.19	0.02	0.02	0.03	0.02	0.02	0.02	0.03	0.03		-5	0.35	0.5	0.41	0.38	0.33	0.36	0.34	0.34	0.08	0.07	0.07	0.07	0.06	0.06	0.07	0.07	0.33	0.37	0.45
-5.5	0.02	0.02	0.02	0.02	0.01	0.01	0.01	0.01	0.01	0.01	0.01	0.01	0.08	0.11	0.1	0.11	0.05	0.06	0.06	0.06	0.02	0.02	0.02	0.02	0.02	0.02	0.02	0.02		-5.5	0.21	0.26	0.3	0.24	0.15	0.13	0.16	0.16	0.04	0.05	0.04	0.05	0.04	0.03	0.04	0.04	0.2	0.17	0.16
-6	0.01	0.01	0.01	0.01	0.01	0.01	0.01	0.01	0.01	0.01	0.01	0.01	0.03	0.05	0.03	0.04	0.02	0.03	0.02	0.02	0.01	0.01	0.01	0.01	0.01	0.01	0.02	0.02		-6	0.09	0.09	0.12	0.09	0.05	0.04	0.05	0.04	0.02	0.02	0.03	0.02	0.02	0.02	0.02	0.02	0.07	0.07	0.08
-6.5	0.01	0.01	0.01	0.01	0.01	0.01	0.01	0.01	0.01	0.01	0.01	0.01	0.01	0.01	0.02	0.01	0.01	0.01	0.01	0.01	0.01	0.01	0.01	0.01	0.01	0.01	0.01	0.01		-6.5	0.01	0.02	0.01	0.02	0.02	0.02	0.02	0.02	0.02	0.01	0.01	0.01	0.01	0.01	0.01	0.01	0.02	0.02	0.02
-9	0.01	0.01	0.01	0.01	0.01	0.01	0.01	0.01	0.01	0.01	0.01	0.01	0.01	0.01	0.01	0.01	0.01	0.01	0.01	0.01	0.01	0.01	0.01	0.01	0.01	0.01	0.01	0.01		-9	0.01	0.01	0.01	0.01	0.01	0.01	0.01	0.01	0.01	0.01	0.01	0.01	0.01	0.01	0.01	0.01	0.01	0.01	0.01
2211 plate 1																														2211 plate 2
	UDP-GlcNAC				UDP				UDP-GlcNAC + UDP				UDP-Gal				UDP-Gal + UDP-GlcNAC				UDP + UDP-Gal				UDP-GlcNAC + UDP + UDP-Gal						UDP-Glc				UDP-Glc + UDP-GlcNAC				UDP-Glc + UDP				UDP-Glc + UDP-GlcNAC + UDP				UDP-Glc + UDP-Gal
Log10 [conc]	Sample 1	Sample 2	Sample 3	Sample 4	Sample 1	Sample 2	Sample 3	Sample 4	Sample 1	Sample 2	Sample 3	Sample 4	Sample 1	Sample 2	Sample 3	Sample 4	Sample 1	Sample 2	Sample 3	Sample 4	Sample 1	Sample 2	Sample 3	Sample 4	Sample 1	Sample 2	Sample 3	Sample 4		Log10 [conc]	Sample 1	Sample 2	Sample 3	Sample 4	Sample 1	Sample 2	Sample 3	Sample 4	Sample 1	Sample 2	Sample 3	Sample 4	Sample 1	Sample 2	Sample 3	Sample 4	Sample 1	Sample 2	Sample 3
-5	0.95213	0.81581	1	0.92889	0.10024	0.08966	0.10349	0.097525	0.14589	0.11304	0.1301	0.12452	0.76799	0.67476	0.85904	0.80207	0.83473	0.7099	0.91992	0.81122	0.11737	0.096672	0.12061	0.10849	0.14877	0.12989	0.16264	0.14549		-5	1	0.84	0.98	0.89	0.86	1	1	0.81	0.14	0.12	0.16	0.15	0.17	0.14	0.17	0.16	0.88	0.75	0.96
-5.5	0.62192	0.64101	0.72219	0.70945	0.10108	0.08435	0.094923	0.093434	0.097962	0.1074	0.11267	0.10868	0.52027	0.47908	0.60463	0.58412	0.54775	0.55087	0.65222	0.67989	0.08745	0.087765	0.10382	0.10218	0.11424	0.10861	0.12454	0.12894		-5.5	0.69	0.78	0.81	0.75	0.65	0.61	0.75	0.7	0.09	0.1	0.13	0.11	0.12	0.12	0.14	0.13	0.68	0.61	0.8
-6	0.48094	0.45834	0.5535	0.5195	0.10477	0.093568	0.10078	0.10556	0.098594	0.096134	0.10922	0.10543	0.34408	0.32213	0.4026	0.40541	0.43826	0.43879	0.53523	0.53627	0.095325	0.096668	0.11485	0.11219	0.11031	0.11089	0.12799	0.12841		-6	0.5	0.6	0.63	0.63	0.44	0.49	0.61	0.52	0.09	0.09	0.14	0.12	0.09	0.11	0.12	0.11	0.48	0.51	0.62
-6.5	0.31235	0.29507	0.3571	0.31946	0.093371	0.087227	0.10054	0.092086	0.099195	0.096565	0.10403	0.10692	0.19608	0.18092	0.22374	0.20083	0.28596	0.22569	0.29441	0.2808	0.095998	0.090868	0.11276	0.10579	0.11368	0.11449	0.13189	0.1257		-6.5	0.39	0.39	0.47	0.41	0.28	0.32	0.43	0.39	0.08	0.08	0.1	0.08	0.08	0.08	0.1	0.11	0.26	0.27	0.34
-7	0.16445	0.15471	0.1912	0.16521	0.084806	0.077958	0.093633	0.10413	0.092116	0.085421	0.1182	0.1037	0.13252	0.10552	0.13697	0.11971	0.17056	0.1377	0.17178	0.15026	0.091571	0.083033	0.10394	0.09775	0.10109	0.10095	0.11668	0.11312		-7	0.16	0.19	0.23	0.2	0.16	0.16	0.2	0.19	0.08	0.08	0.08	0.09	0.08	0.08	0.1	0.1	0.15	0.14	0.16
-7.5	0.12241	0.13759	0.14131	0.14267	0.080525	0.085618	0.1028	0.091083	0.094425	0.10328	0.11283	0.11881	0.10036	0.10474	0.11415	0.11353	0.10009	0.10618	0.11701	0.1154	0.08888	0.093682	0.10972	0.10757	0.088677	0.10221	0.11729	0.12075		-7.5	0.11	0.13	0.14	0.14	0.1	0.11	0.13	0.13	0.07	0.07	0.08	0.08	0.07	0.09	0.09	0.1	0.1	0.1	0.11
-8	0.10926	0.1057	0.1189	0.11246	0.093361	0.10071	0.096524	0.08979	0.10519	0.094111	0.10822	0.10917	0.090509	0.09127	0.10283	0.11497	0.098294	0.11397	0.11167	0.10653	0.094931	0.10162	0.11218	0.10483	0.10298	0.10286	0.12198	0.11362		-8	0.09	0.11	0.12	0.1	0.09	0.08	0.12	0.09	0.07	0.07	0.09	0.08	0.07	0.11	0.09	0.1	0.08	0.09	0.09
-8.5	0.096011	0.10448	0.10985	0.10026	0.088986	0.082678	0.094103	0.087756	0.087605	0.082921	0.11152	0.08572	0.088322	0.10617	0.099011	0.09111	0.092529	0.089269	0.10303	0.09321	0.092667	0.064073	0.1087	0.08872	0.10083	0.095043	0.11772	0.10619		-8.5	0.05	0.07	0.06	0.08	0.08	0.09	0.1	0.11	0.07	0.07	0.08	0.07	0.07	0.07	0.09	0.07	0.07	0.07	0.08
-9	0.099773	0.09698	0.092977	0.11665	0.10397	0.080178	0.093433	0.098029	0.079474	0.089375	0.098382	0.090565	0.080448	0.094425	0.093677	0.091761	0.076788	0.11438	0.098921	0.095898	0.086476	0.089765	0.10254	0.10175	0.091898	0.097902	0.10972	0.10915		-9	0.07	0.08	0.07	0.08	0.08	0.08	0.08	0.08	0.08	0.08	0.08	0.08	0.06	0.08	0.07	0.08	0.06	0.08	0.09
		Normalized Fluorescence Readouts from Experiments Using UNEQUAL Mixtures:
H-20 plate 1																														H-20 plate 2
	90 % UDP-Glc / 10% UDP-Gal				80 % UDP-Glc / 20% UDP-Gal				60 % UDP-Glc / 40% UDP-Gal																						40 % UDP-Glc / 60% UDP-Gal				20 % UDP-Glc / 90% UDP-Gal				10 % UDP-Glc / 90% UDP-Gal
Log10 [conc]	Sample 1	Sample 2	Sample 3	Sample 4	Sample 1	Sample 2	Sample 3	Sample 4	Sample 1	Sample 2	Sample 3	Sample 4																		Log10 [conc]	Sample 1	Sample 2	Sample 3	Sample 4	Sample 1	Sample 2	Sample 3	Sample 4	Sample 1	Sample 2	Sample 3	Sample 4
-3	0.68	0.67	0.76	0.78	0.67	0.73	0.68	0.68	0.66	0.81	0.84	0.99																		-3	0.88	0.98	0.91	0.82	0.85	0.89	0.89	0.82	0.82	0.94	0.87	0.95
-3.5	0.66	0.78	0.69	0.82	0.77	0.81	0.76	0.88	0.87	0.89	0.93	0.88																		-3.5	0.88	0.96	0.84	0.96	1	1	0.88	0.88	0.85	0.98	0.95	0.97
-4	0.74	0.76	0.75	0.81	0.71	0.79	0.72	0.87	0.76	0.94	0.88	1																		-4	0.77	0.93	0.78	0.84	0.89	0.9	0.81	0.83	0.86	0.87	0.83	0.86
-4.5	0.5	0.56	0.56	0.5	0.58	0.64	0.59	0.62	0.6	0.72	0.67	0.74																		-4.5	0.63	0.67	0.68	0.55	0.7	0.69	0.64	0.65	0.62	0.78	0.68	0.83
-5	0.3	0.28	0.29	0.29	0.26	0.33	0.32	0.37	0.34	0.4	0.49	0.48																		-5	0.35	0.39	0.39	0.42	0.41	0.46	0.49	0.41	0.41	0.44	0.42	0.45
-5.5	0.11	0.11	0.11	0.11	0.12	0.12	0.12	0.12	0.12	0.17	0.18	0.15																		-5.5	0.11	0.12	0.12	0.11	0.12	0.15	0.13	0.17	0.17	0.17	0.15	0.16
-6	0.04	0.04	0.04	0.04	0.04	0.04	0.05	0.05	0.04	0.05	0.05	0.04																		-6	0.04	0.04	0.04	0.04	0.05	0.04	0.04	0.04	0.04	0.05	0.04	0.05
-9	0.02	0.03	0.03	0.03	0.02	0.02	0.03	0.03	0.02	0.01	0.03	0.02																		-9	0.02	0.02	0.02	0.02	0.02	0.02	0.02	0.02	0.02	0.02	0.02	0.03
K-3 plate 1																														K-3 plate 2
	90 % UDP-Glc / 10% UDP-Gal				80 % UDP-Glc / 20% UDP-Gal				60 % UDP-Glc / 40% UDP-Gal																						40 % UDP-Glc / 60% UDP-Gal				20 % UDP-Glc / 90% UDP-Gal				10 % UDP-Glc / 90% UDP-Gal
Log10 [conc]	Sample 1	Sample 2	Sample 3	Sample 4	Sample 1	Sample 2	Sample 3	Sample 4	Sample 1	Sample 2	Sample 3	Sample 4																		Log10 [conc]	Sample 1	Sample 2	Sample 3	Sample 4	Sample 1	Sample 2	Sample 3	Sample 4	Sample 1	Sample 2	Sample 3	Sample 4
-3	0.79	0.91	0.88	0.77	0.87	0.86	0.87	0.77	0.74	0.81	0.84	0.7																		-3	0.93	0.96	0.89	0.83	0.84	0.95	0.85	0.79	0.83	1	0.88	0.74
-3.5	0.88	1	0.75	0.79	0.74	0.84	0.82	0.8	0.66	0.83	0.94	0.8																		-3.5	0.88	0.93	0.85	0.95	0.79	0.94	0.89	0.87	0.81	0.89	0.93	0.92
-4	0.57	0.59	0.66	0.65	0.55	0.62	0.55	0.58	0.5	0.63	0.63	0.68																		-4	0.6	0.77	0.67	0.68	0.64	0.65	0.61	0.67	0.68	0.77	0.71	0.77
-4.5	0.33	0.34	0.41	0.43	0.35	0.33	0.37	0.36	0.3	0.33	0.34	0.35																		-4.5	0.38	0.4	0.43	0.4	0.42	0.4	0.43	0.45	0.4	0.46	0.4	0.5
-5	0.17	0.19	0.18	0.19	0.17	0.14	0.17	0.18	0.19	0.2	0.19	0.2																		-5	0.21	0.24	0.24	0.25	0.23	0.27	0.25	0.26	0.24	0.25	0.25	0.26
-5.5	0.14	0.15	0.15	0.15	0.13	0.14	0.15	0.14	0.13	0.15	0.14	0.15																		-5.5	0.18	0.19	0.19	0.2	0.18	0.18	0.19	0.19	0.17	0.18	0.19	0.12
-6	0.13	0.13	0.13	0.14	0.13	0.13	0.08	0.13	0.1	0.13	0.12	0.15																		-6	0.16	0.17	0.16	0.17	0.17	0.18	0.13	0.18	0.15	0.17	0.11	0.16
-9	0.13	0.13	0.15	0.14	0.13	0.13	0.13	0.13	0.12	0.13	0.14	0.13																		-9	0.16	0.18	0.18	0.1	0.1	0.14	0.17	0.12	0.15	0.17	0.16	0.14
L-3 plate 1																														L-3 plate 2
	90 % UDP-Glc / 10% UDP-Gal				80 % UDP-Glc / 20% UDP-Gal				60 % UDP-Glc / 40% UDP-Gal																						40 % UDP-Glc / 60% UDP-Gal				20 % UDP-Glc / 90% UDP-Gal				10 % UDP-Glc / 90% UDP-Gal
Log10 [conc]	Sample 1	Sample 2	Sample 3	Sample 4	Sample 1	Sample 2	Sample 3	Sample 4	Sample 1	Sample 2	Sample 3	Sample 4																		Log10 [conc]	Sample 1	Sample 2	Sample 3	Sample 4	Sample 1	Sample 2	Sample 3	Sample 4	Sample 1	Sample 2	Sample 3	Sample 4
-3	0.82	0.88	0.81	0.79	0.81	0.97	0.78	0.98	0.69	0.88	0.78	0.89																		-3	0.09	1	0.1	0.92	0.87	0.83	0.91	0.76	0.65	0.93	0.89	0.95
-3.5	0.84	1	0.77	0.78	0.79	0.96	0.76	0.76	0.88	0.93	0.79	0.86																		-3.5	0.08	0.93	0.08	0.8	0.89	0.93	0.79	0.96	0.87	0.82	0.94	0.92
-4	0.78	0.95	0.86	0.8	0.62	0.76	0.71	0.62	0.64	0.71	0.68	0.67																		-4	0.09	0.85	0.75	0.78	0.71	0.76	0.76	0.81	0.7	0.74	0.9	0.87
-4.5	0.53	0.65	0.64	0.54	0.48	0.54	0.55	0.58	0.55	0.57	0.56	0.56																		-4.5	0.66	0.68	0.66	0.66	0.61	0.65	0.61	0.62	0.52	0.64	0.59	0.64
-5	0.42	0.41	0.43	0.36	0.34	0.45	0.44	0.4	0.27	0.46	0.44	0.32																		-5	0.46	0.56	0.5	0.57	0.52	0.59	0.54	0.46	0.51	0.43	0.57	0.54
-5.5	0.17	0.16	0.19	0.19	0.14	0.14	0.15	0.16	0.14	0.18	0.17	0.13																		-5.5	0.26	0.28	0.28	0.28	0.23	0.29	0.25	0.26	0.26	0.25	0.29	0.32
-6	0.07	0.07	0.07	0.07	0.04	0.05	0.06	0.04	0.04	0.04	0.05	0.04																		-6	0.1	0.12	0.12	0.14	0.11	0.11	0.1	0.11	0.09	0.09	0.08	0.09
-9	0.02	0.02	0.02	0.02	0.02	0.02	0.02	0.02	0.02	0.02	0.02	0.02																		-9	0.03	0.04	0.03	0.03	0.03	0.03	0.03	0.03	0.02	0.03	0.03	0.03
2211 plate 1																														2211 plate 2
	90 % UDP-Glc / 10% UDP-Gal				80 % UDP-Glc / 20% UDP-Gal				60 % UDP-Glc / 40% UDP-Gal																						40 % UDP-Glc / 60% UDP-Gal				20 % UDP-Glc / 90% UDP-Gal				10 % UDP-Glc / 90% UDP-Gal
Log10 [conc]	Sample 1	Sample 2	Sample 3	Sample 4	Sample 1	Sample 2	Sample 3	Sample 4	Sample 1	Sample 2	Sample 3	Sample 4																		Log10 [conc]	Sample 1	Sample 2	Sample 3	Sample 4	Sample 1	Sample 2	Sample 3	Sample 4	Sample 1	Sample 2	Sample 3	Sample 4
-5	0.9	0.86	1	0.93	0.78	0.85	0.97	0.9	0.75	0.75	0.82	0.77																		-5	0.61864	0.87828	0.97778	1	0.80296	0.85321	0.9523	0.96886	0.52539	0.8589	0.54324	0.82086
-5.5	0.71	0.77	0.84	0.83	0.6	0.64	0.73	0.9	0.58	0.59	0.76	0.6																		-5.5	0.69214	0.80421	0.84085	0.76137	0.6924	0.73762	0.8015	0.88279	0.62522	0.67042	0.73466	0.75989
-6	0.53	0.48	0.57	0.6	0.52	0.56	0.53	0.58	0.39	0.4	0.48	0.45																		-6	0.56804	0.64872	0.59731	0.56567	0.57201	0.52017	0.67198	0.47917	0.41294	0.4613	0.54673	0.64317
-6.5	0.32	0.33	0.34	0.38	0.23	0.3	0.35	0.34	0.22	0.24	0.3	0.27																		-6.5	0.36897	0.40209	0.43517	0.48131	0.33914	0.36968	0.39404	0.36576	0.2366	0.29772	0.40911	0.36558
-7	0.19	0.22	0.22	0.23	0.17	0.19	0.18	0.19	0.15	0.15	0.17	0.16																		-7	0.19195	0.2598	0.242	0.25681	0.18352	0.31778	0.25193	0.21803	0.1519	0.18073	0.2233	0.20516
-7.5	0.14	0.16	0.14	0.17	0.15	0.12	0.14	0.14	0.12	0.12	0.13	0.13																		-7.5	0.12852	0.15542	0.15596	0.17745	0.11761	0.13266	0.14182	0.14364	0.099979	0.11588	0.126	0.12209
-8	0.12	0.12	0.13	0.14	0.11	0.11	0.13	0.12	0.11	0.11	0.12	0.11																		-8	0.10096	0.10541	0.11922	0.11923	0.10012	0.10675	0.12047	0.11171	0.093312	0.11178	0.1118	0.114
-9	0.12	0.12	0.14	0.12	0.12	0.11	0.13	0.12	0.11	0.11	0.13	0.12																		-9	0.092389	0.097592	0.10808	0.11492	0.09132	0.097205	0.10556	0.1179	0.111	0.10504	0.11311	0.11706
[truncated: 13 more columns]
