# Supplementary material for: Decoding Complex Chemical Mixtures with a Physical Model of a Sensor Array
Source: PLOS journal article supplement (doi:10.1371/journal.pcbi.1002224), 2011-10-20
Supplement: S14 (10.1371/journal.pcbi.1002224.s014) [file journal.pcbi.1002224.s014]

|                  |                  | UDP (L1)        | UDP-Gal (L2)    | UDP-Glc (L3)    | UDP-GlcNAc (L4) |
|------------------|------------------|-----------------|-----------------|-----------------|-----------------|
| <b>H-20 (R1)</b> | $\Delta G$       | $-7.42 \pm .05$ | $-6.69 \pm .04$ | $-6.29 \pm .06$ | $-6.16 \pm .06$ |
|                  | $A$              | $.008 \pm .009$ | $.994 \pm .005$ | $.74 \pm .01$   | $.51 \pm .01$   |
|                  | $b$              | $.006 \pm .005$ | $.015 \pm .009$ | $.014 \pm .009$ | $.008 \pm .006$ |
|                  | $\tilde{\sigma}$ | $.036 \pm .004$ | $.041 \pm .005$ | $.037 \pm .005$ | $.029 \pm .004$ |
| <b>K-3 (R2)</b>  | $\Delta G$       | $-8.2 \pm .2$   | $-5.64 \pm .07$ | $-5.36 \pm .04$ | $-5.36 \pm .06$ |
|                  | $A$              | $.18 \pm .01$   | $.81 \pm .02$   | $.94 \pm .02$   | $.55 \pm .01$   |
|                  | $b$              | $.10 \pm .02$   | $.11 \pm .01$   | $.069 \pm .008$ | $.111 \pm .006$ |
|                  | $\tilde{\sigma}$ | $.022 \pm .003$ | $.043 \pm .005$ | $.030 \pm .004$ | $.022 \pm .003$ |
| <b>L-3 (R3)</b>  | $\Delta G$       | $-7.4 \pm .1$   | $-6.21 \pm .07$ | $-6.6 \pm .1$   | $-5.60 \pm .06$ |
|                  | $A$              | $.02 \pm .02$   | $.85 \pm .03$   | $.83 \pm .03$   | $.43 \pm .01$   |
|                  | $b$              | $.01 \pm .01$   | $.02 \pm .01$   | $.04 \pm .02$   | $.007 \pm .004$ |
|                  | $\tilde{\sigma}$ | $.064 \pm .009$ | $.049 \pm .007$ | $.070 \pm .009$ | $.018 \pm .002$ |
| <b>2211 (R4)</b> | $\Delta G$       | $-10.3 \pm .3$  | $-7.69 \pm .09$ | $-8.48 \pm .08$ | $-8.00 \pm .09$ |
|                  | $A$              | $.010 \pm .009$ | $.82 \pm .04$   | $.85 \pm .02$   | $.89 \pm .04$   |
|                  | $b$              | $0.05 \pm .01$  | $.094 \pm .008$ | $.08 \pm .01$   | $.11 \pm .01$   |
|                  | $\tilde{\sigma}$ | $.019 \pm .002$ | $.035 \pm .005$ | $.046 \pm .006$ | $.044 \pm .006$ |
